# Supplementary material
Source: PubMed Central journal article supplement (PMC2930696)
Supplement: supp_M110.105775_jbc.M110.105775-1.pdf [file supp_M110.105775_jbc.M110.105775-1.pdf]

## SUPPLEMENTAL DATA

Sup. Fig. 1. The diminished RNase H activity of N348I is amplified under multiple-turnover. On the PPT sequence \*17r8d-57d, in the absence of nucleotide, subsequent RNase H activity increases over time in the presence of 6mM Mg<sup>2+</sup>. N348I exhibits the least overall activity where RNase H activity from 6 seconds to 10 minutes follows the order *WT* > *Y181C* > *K103N* > *N348I*.

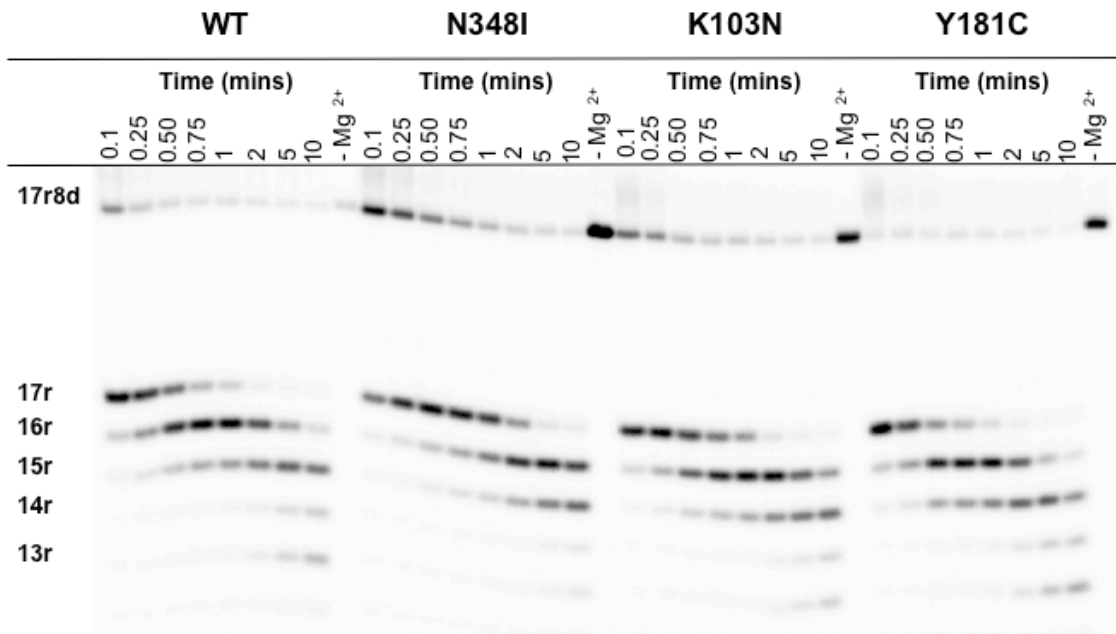

Biondi *et al.* Sup. Fig. 1
